# Supplementary material
Source: bioRxiv or medRxiv preprint supplement (https://www.biorxiv.org/highwire/filestream/106670/field_highwire_adjunct_files/3/351635-4.pdf)
Supplement: Supplementary file [file 351635-4.pdf]

**Supplementary Table 3. Identification of metal complexes by ESI-MS**

| <b>Ion</b>           | <b>Theoretical m/z</b> | <b>Observed m/z</b> |
|----------------------|------------------------|---------------------|
| Peptide              | 866.3166               | 866.3190            |
| Peptide +1FeIII      | 892.7723               | none                |
| Peptide +2FeIII      | 919.2280               | none                |
| Peptide +3FeIII      | 945.6838               | none                |
| Peptide +1FeII       | 893.2762               | 893.2758            |
| Peptide +2FeII       | 920.2358               | 920.2351            |
| Peptide +3FeII       | 947.1955               | 947.1934            |
| Peptide +1Zn         | 897.2733               | 897.2738            |
| Peptide +2Zn         | 928.2301               | 928.2303            |
| Peptide +3Zn         | 959.1868               | 959.1882            |
| Peptide +1Cu         | 896.7735               | 896.7734            |
| Peptide +2Cu         | 927.2305               | 927.2289            |
| Peptide +3Cu         | 957.6875               | 957.6885            |
| Peptide +1Mn         | 892.7778               | 892.7773            |
| Peptide +2Mn         | 919.2390               | 919.2380            |
| Peptide +3Mn         | 945.7002               | 945.6984            |
| Peptide +4Mn         | 972.1614               | 972.1589            |
| Peptide +1FeII +1Mn  | 919.7374               | 919.7355            |
| Peptide +1FeII +1CuI | 924.2371               | 924.2369            |
| Peptide +1FeII +1Zn  | 925.2314               | 925.2346            |
| Peptide +1Cu +1Mn    | 923.2347               | 923.2355            |
| Peptide +1Cu +2Mn    | 949.6959               | 949.6963            |
| Peptide +1Zn +2Mn    | 950.1957               | 950.1976            |
